# Supplementary material
Source: publisher figshare collection journal article supplement (https://gsapubs.figshare.com/ndownloader/files/22759088)
Supplement: Supplementary file 1 [file 22759088]

# 1 APPENDIX

2 A1: Maps used in the study of correlations between long-term exhumation trends and present-day  
3 forcing parameters (Table 1, appendices A1, A2 and A3), and in the cross-sections (Figure 3).

4

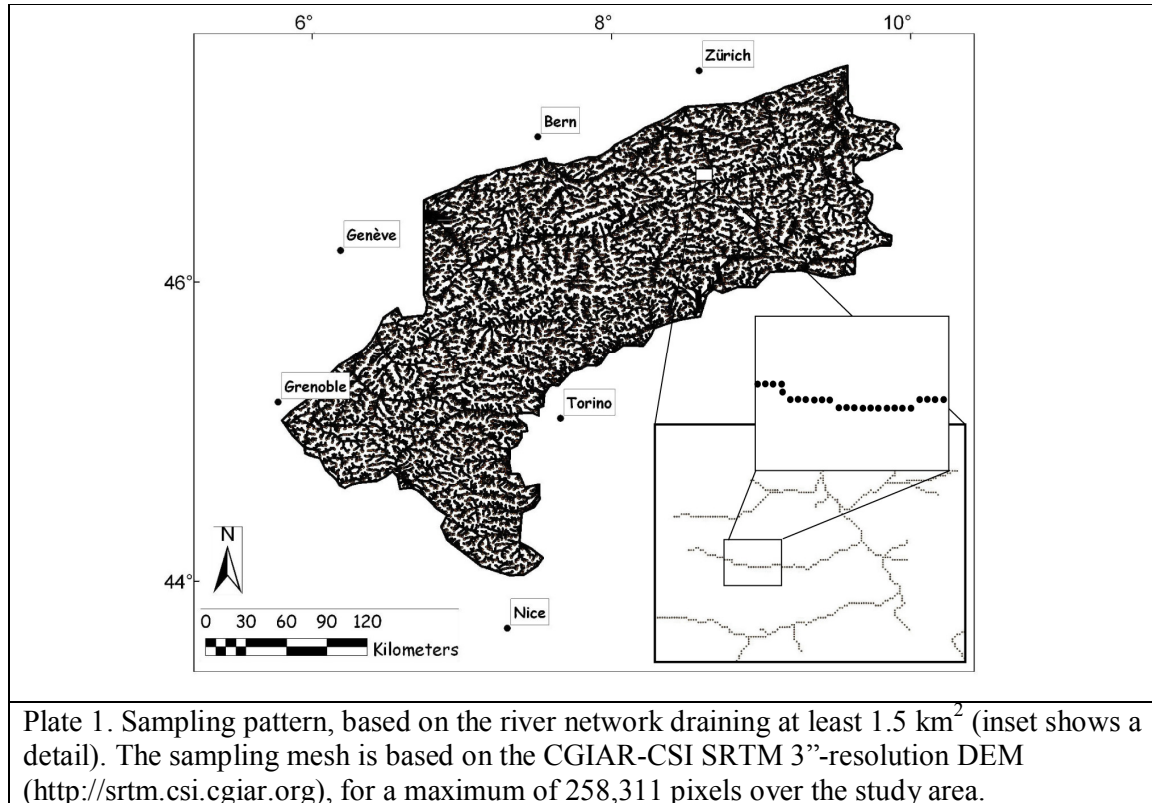

5

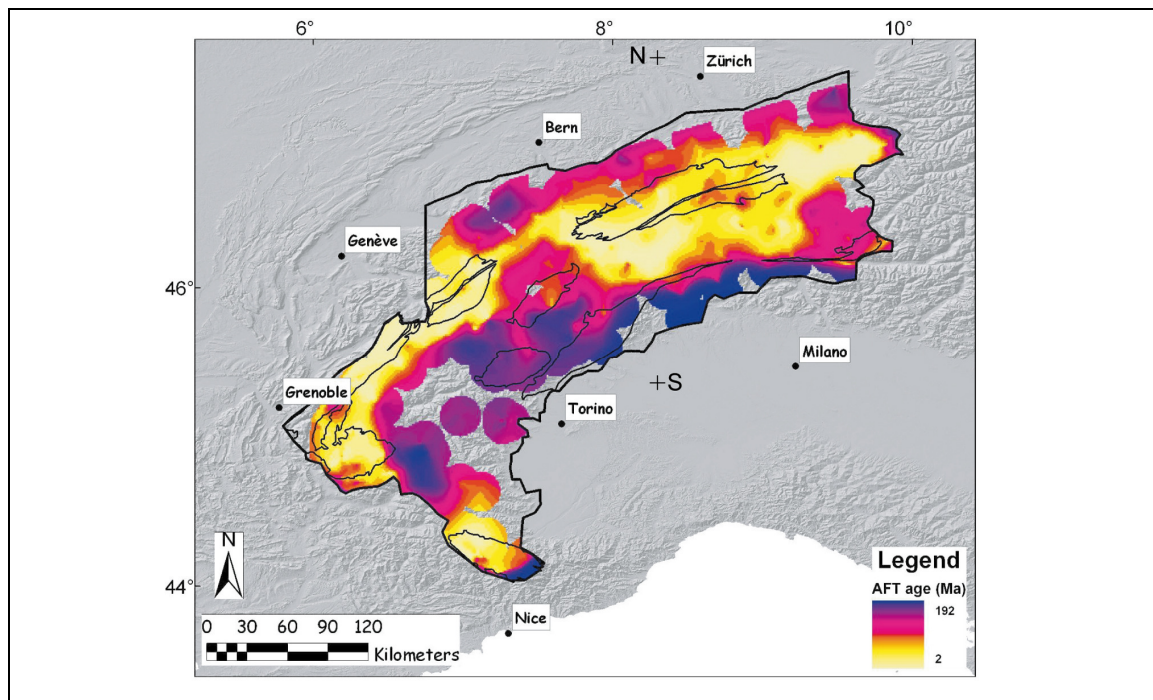

Plate 2. Interpolated apatite fission track (AFT) age, after Vernon et al. (2008). N-S: location of cross-section shown in Figure 3

6

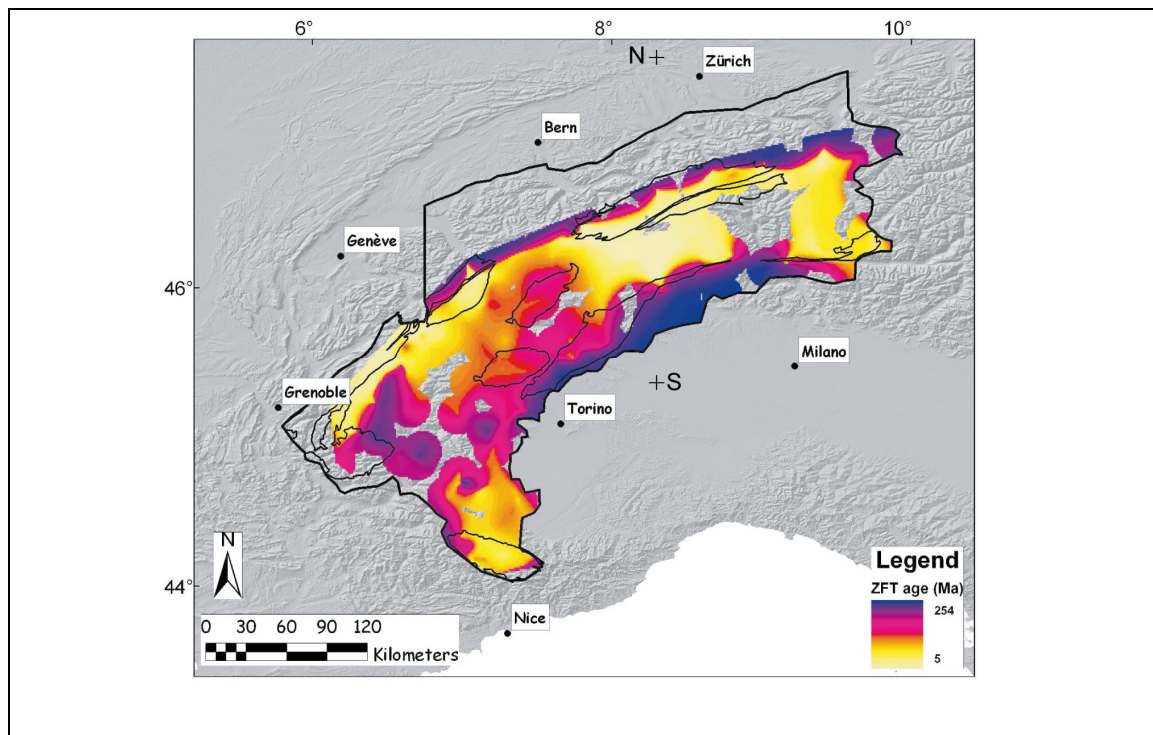

Plate 3. Interpolated zircon fission track (ZFT) age after Vernon et al. (2008).

7

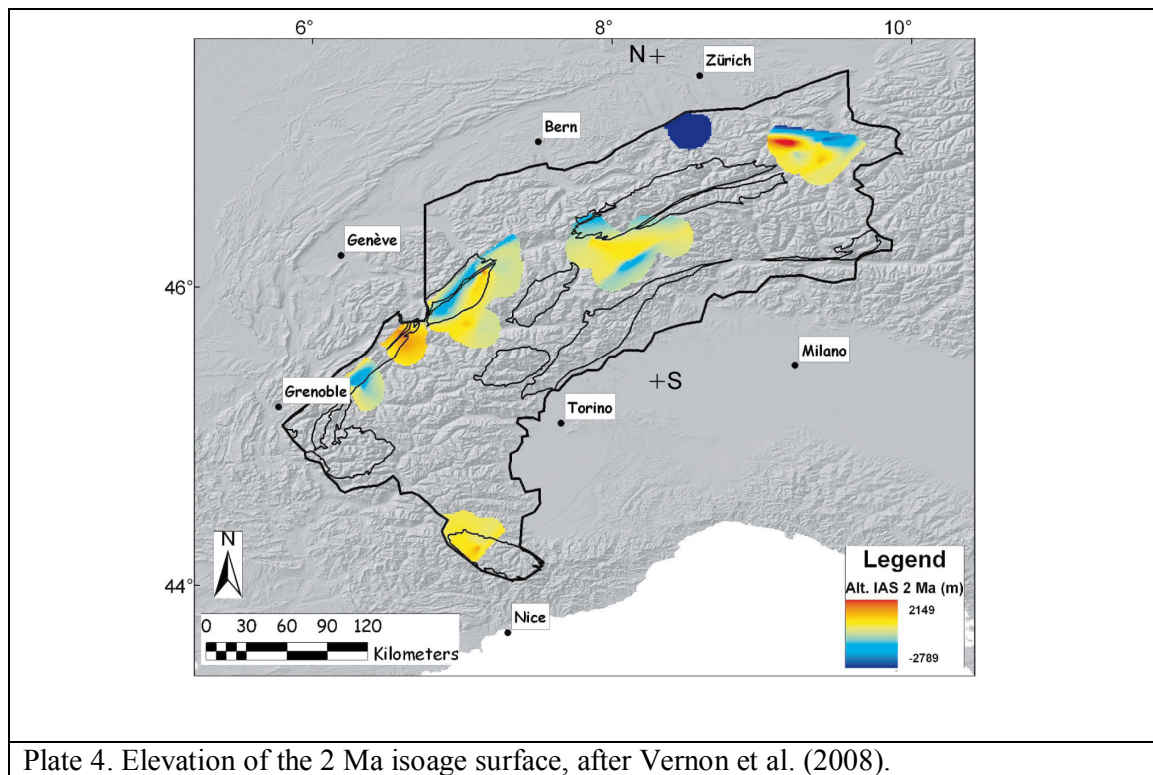

8

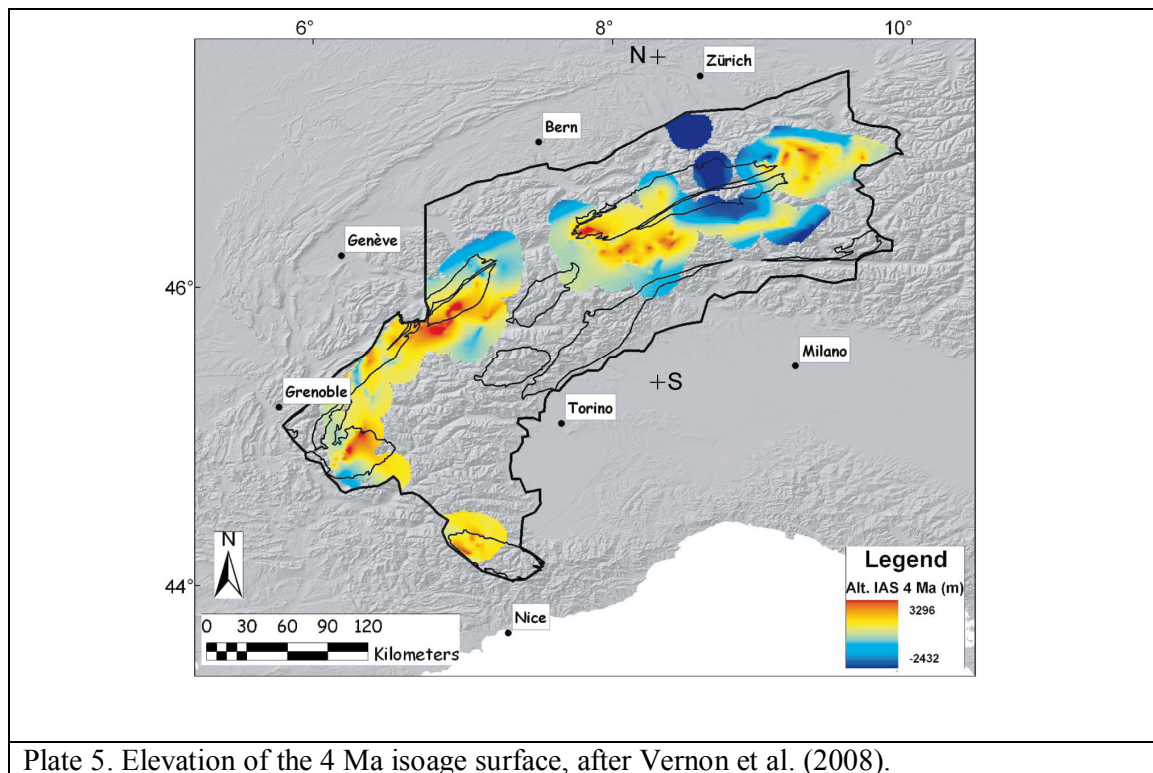

9



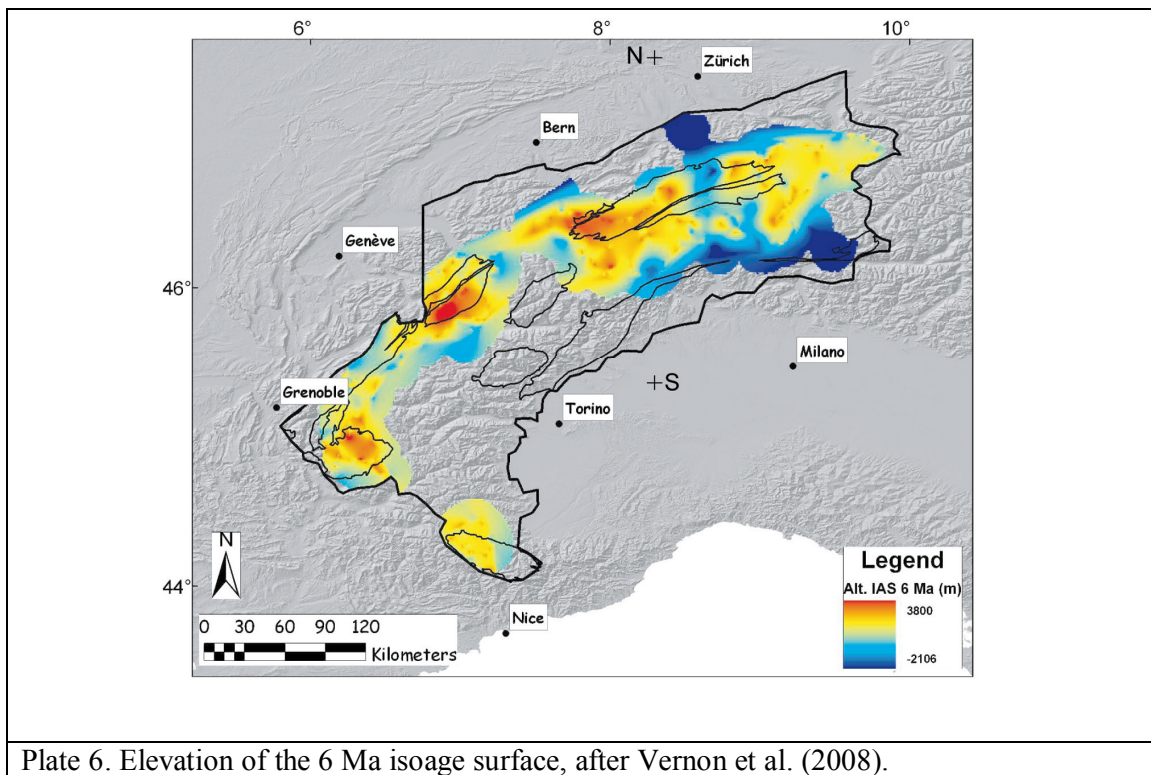

10

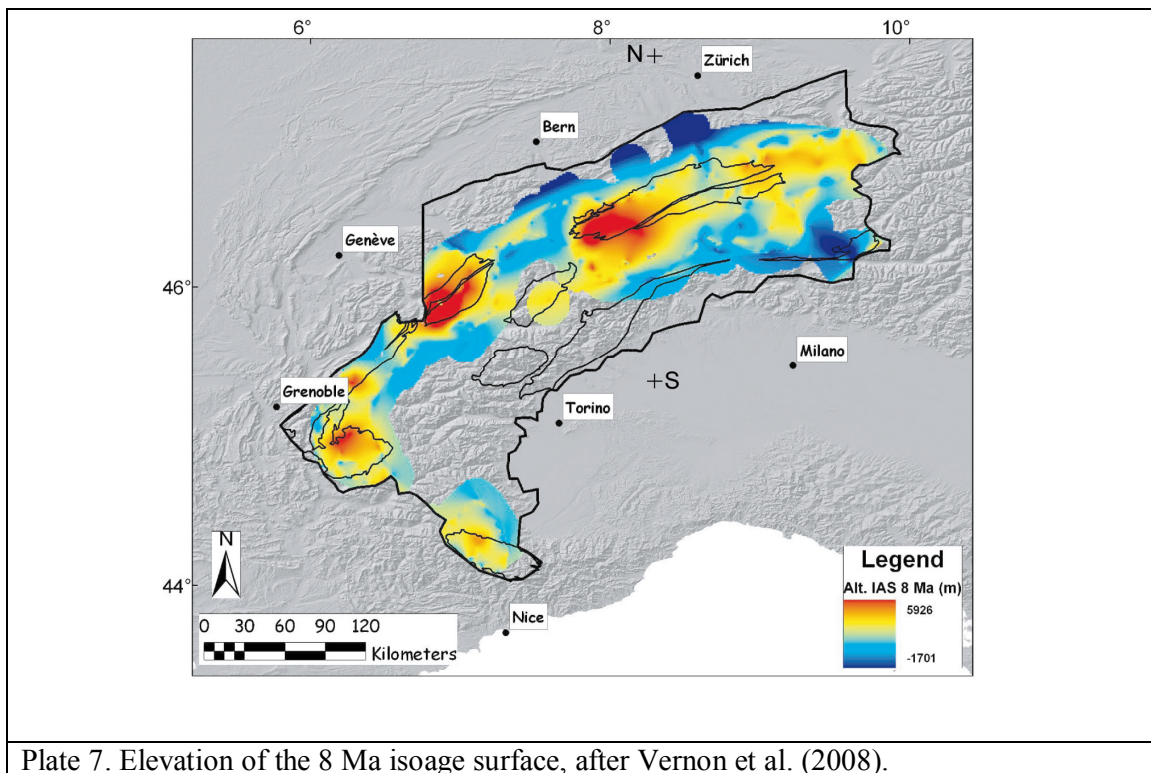

11

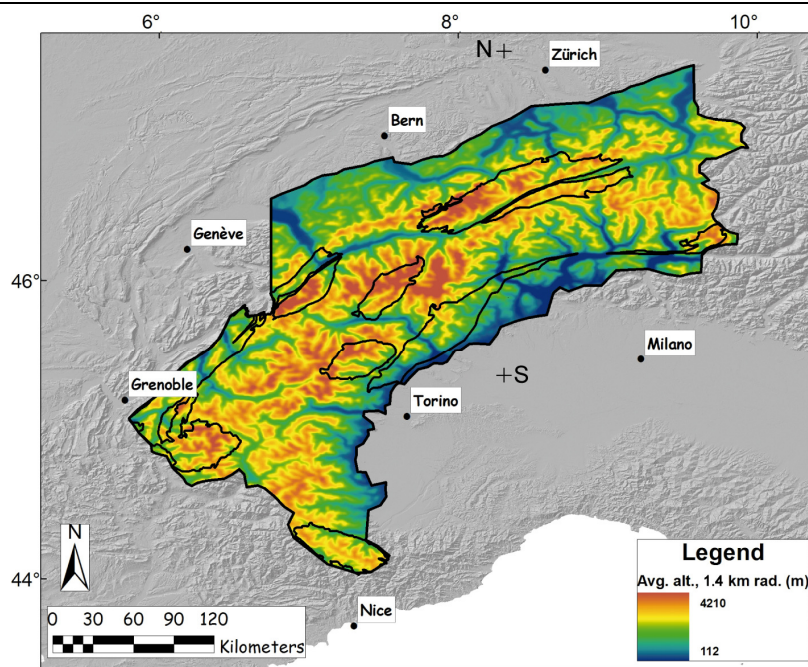

Plate 8. Mean elevation in a 1.4 km radius, calculated using the DEM obtained from the CGIAR-CSI SRTM 3"-resolution database (<http://srtm.csi.cgiar.org>).

12

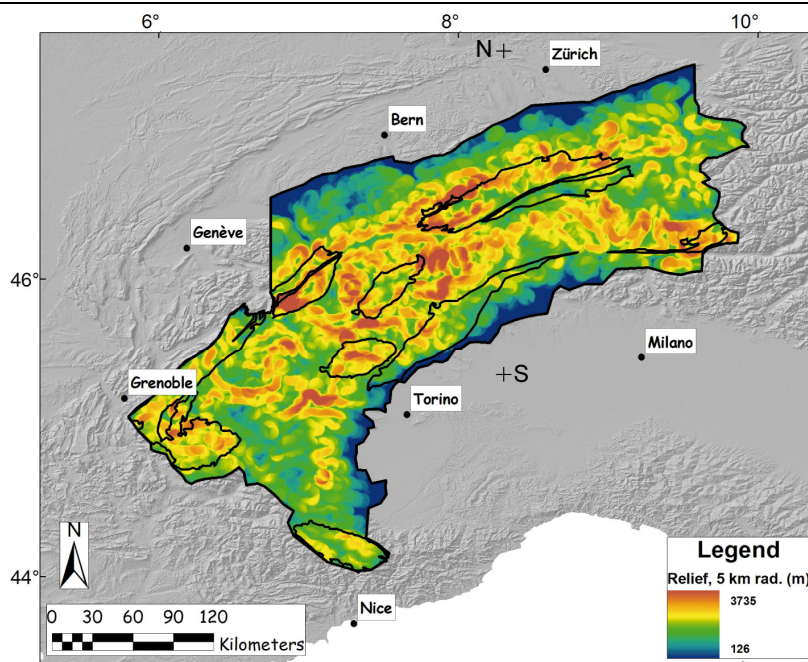

Plate 9. Relief (difference between maximum and minimum elevation) in a 5 km radius, calculated using the DEM obtained from the CGIAR-CSI SRTM 3"-resolution database (<http://srtm.csi.cgiar.org>).

13



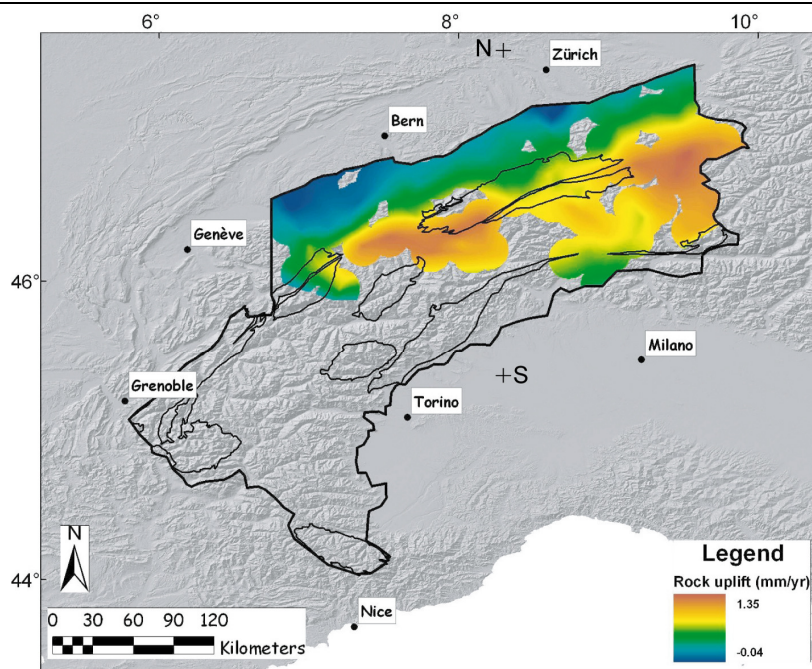

Plate 10. Annual uplift rate measured by geodesy, from the Swiss Federal Office of Topography (SwissTopo) geodetic database (Schlatter, 2007).

14

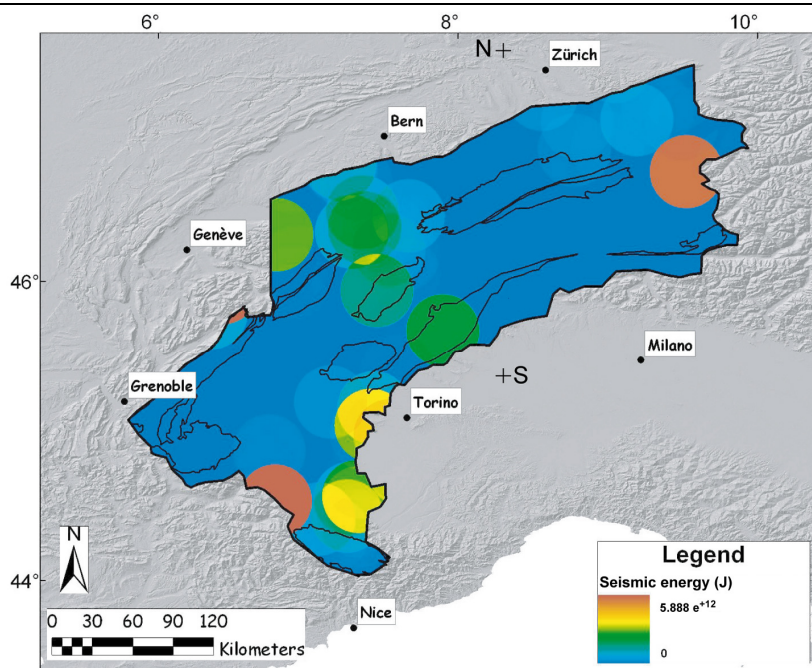

Plate 11. Cumulated seismic energy released, using the earthquake database in Delacou et al. (2004), for the record over the 1959-2000 period for which the focal mechanism is known.

15

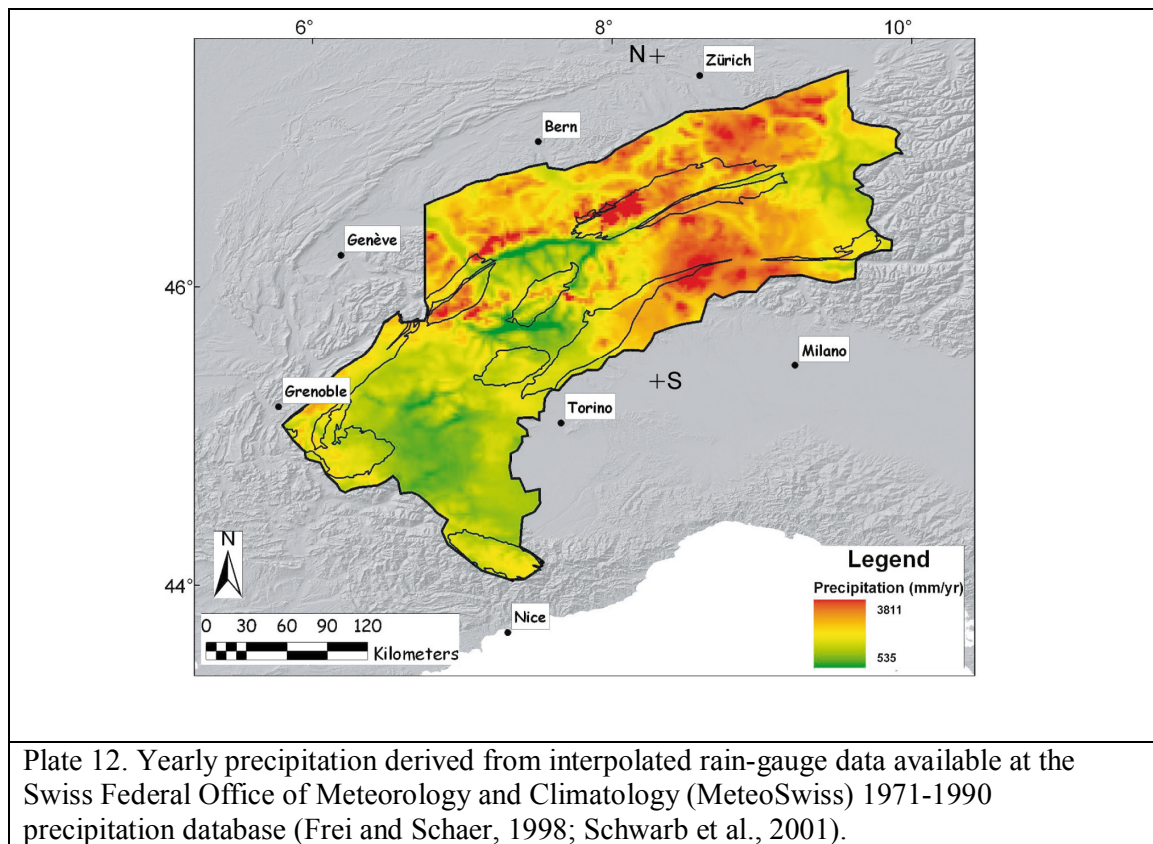

16

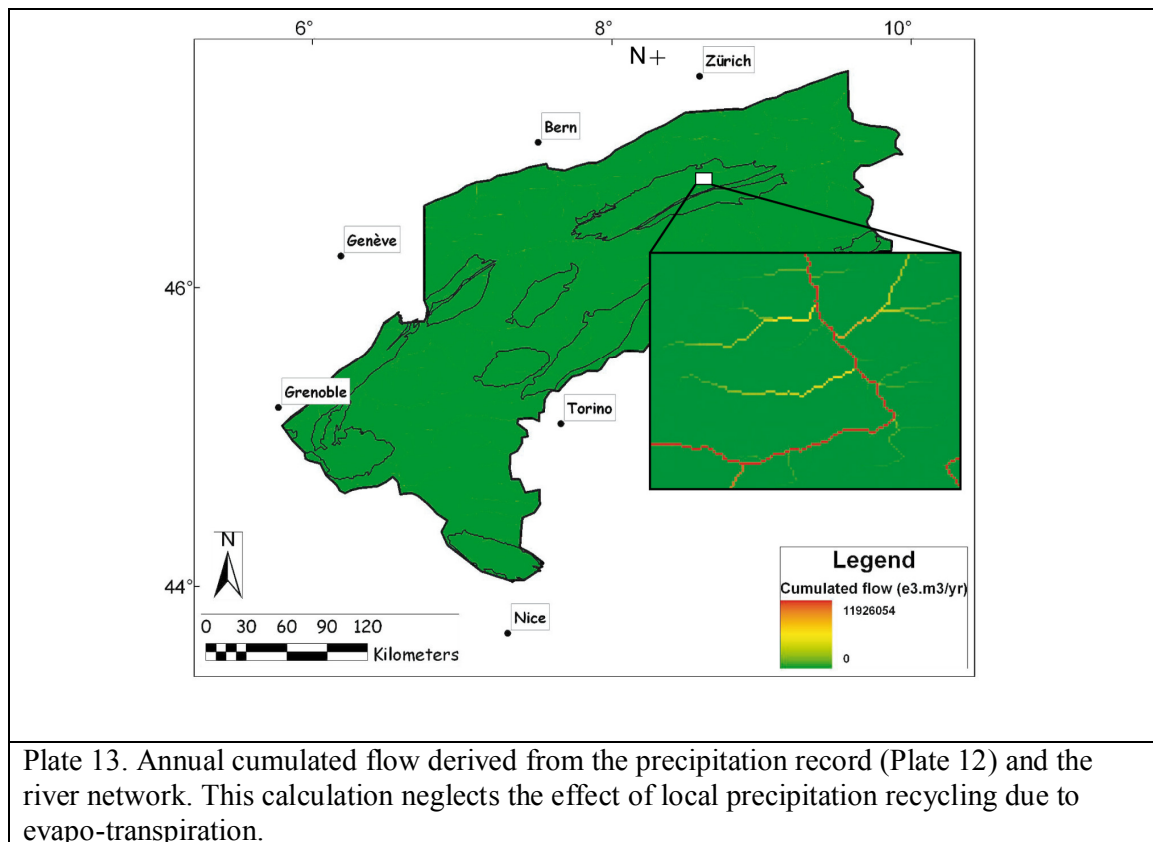

17

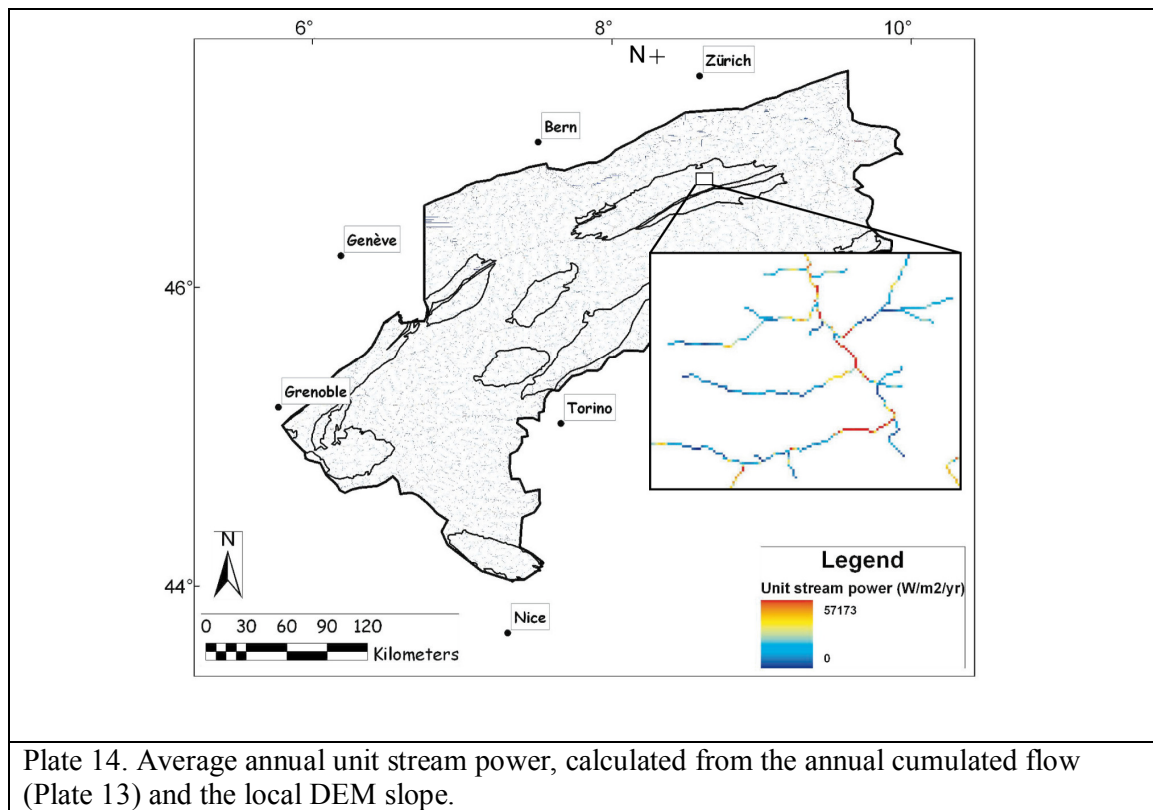



19 A2: Table of Kendall  $\tau$ -b correlation coefficients between different control parameters

20

|                   | Rock uplift | Precipitation | Cumulated<br>flow | Stream power | Seismic energy | Relief<br>(5 km) |
|-------------------|-------------|---------------|-------------------|--------------|----------------|------------------|
| Precipitation     | -0.207      |               |                   |              |                |                  |
| Cumulated<br>flow | 0.004       | 0.045         |                   |              |                |                  |
| Stream power      | 0.192       | 0.016         | 0.335             |              |                |                  |
| Seismic<br>energy | -0.067      | -0.251        | -0.049            | -0.061       |                |                  |
| Relief (5 km)     | 0.397       | -0.056        | -0.022            | 0.219        | -0.083         |                  |
| Mean<br>elevation | 0.248       | -0.036        | -0.191            | 0.076        | -0.013         | 0.284            |

21 A3: Table of Kendall  $\tau$ -b correlation coefficients between different measures of long-term  
 22 exhumation  
 23

|                                              | AFT Age | 2 Ma iso-age<br>surface<br>elevation | 4 Ma iso-age<br>surface<br>elevation |
|----------------------------------------------|---------|--------------------------------------|--------------------------------------|
| 2 Ma iso-age surface elevation               | -0.153  |                                      |                                      |
| 4 Ma iso-age surface elevation               | -0.317  | 0.406                                |                                      |
| Distance between 4-2 Ma iso-<br>age surfaces | -0.325  | -0.060                               | 0.535                                |

24
